# Supplementary material
Source: PubMed Central journal article supplement (PMC7837114)
Supplement: mmc1.pdf [file mmc1.pdf]

**Supplemental Information**

**COVID-19-neutralizing antibodies**

**predict disease severity and survival**

**Wilfredo F. Garcia-Beltran, Evan C. Lam, Michael G. Astudillo, Diane Yang, Tyler E. Miller, Jared Feldman, Blake M. Hauser, Timothy M. Caradonna, Kiera L. Clayton, Adam D. Nitido, Mandakolathur R. Murali, Galit Alter, Richelle C. Charles, Anand Dighe, John A. Branda, Jochen K. Lennerz, Daniel Lingwood, Aaron G. Schmidt, A. John Iafrate, and Alejandro B. Balazs**

**Table S1**

| Severity Cohort                                | non-hospitalized | hospitalized | intubated      | deceased      | immunosuppressed         |
|------------------------------------------------|------------------|--------------|----------------|---------------|--------------------------|
| <b>Total</b>                                   | n = 18           | n = 45       | n = 27         | n = 10        | n = 13                   |
| <b>Demographics</b>                            |                  |              |                |               |                          |
| Age (median, range)                            | 26.5 (0 - 68)    | 66 (0 - 91)  | 63 (35 - 83)   | 60 (39 - 77)  | 60 (29 - 80)             |
| Sex (% male)                                   | 50% (9/18)       | 49% (22/45)  | 78% (21/27)    | 70% (7/10)    | 62% (8/13)               |
| Language, primary (% non-English)              | 39% (7/18)       | 36% (16/45)  | 59% (16/27)    | 20% (2/10)    | 8% (1/13)                |
| <b>Clinical Course</b>                         |                  |              |                |               |                          |
| PCR-positive days <sup>‡</sup> (median, range) | 11 (0 - 44)      | 17 (2 - 55)  | 34.5 (13 - 68) | 19.5 (7 - 35) | 36 (10 - 55)             |
| Hospitalized                                   | 0% (0/18)        | 100% (45/45) | 100% (27/27)   | 100% (10/10)  | 85% (11/13)              |
| Days hospitalized (median, range)              | -                | 5 (1 - 41)   | 43 (15 - 118)  | 31.5 (1 - 66) | 10 (0 - 50)              |
| Intubated                                      | 0% (0/18)        | 0% (0/45)    | 100% (27/27)   | 90% (9/10)    | 38% (5/13)               |
| Days intubated (median, range)                 | -                | -            | 26 (6 - 65)    | 22.5 (0 - 57) | 0 (0 - 41)               |
| ECMO                                           | 0% (0/18)        | 0% (0/45)    | 7% (2/27)      | 20% (2/10)    | 0% (0/13)                |
| Deceased                                       | 0% (0/18)        | 0% (0/45)    | 0% (0/27)      | 100% (10/10)  | 0% (0/13)                |
| <b>Pre-existing medical conditions</b>         |                  |              |                |               |                          |
| No significant conditions                      | 94% (17/18)      | 9% (4/45)    | 4% (1/27)      | 20% (2/10)    | 0% (0/13)                |
| Lung disease                                   | 0% (0/18)        | 31% (14/45)  | 11% (3/27)     | 10% (1/10)    | 0% (0/13)                |
| Heart disease                                  | 0% (0/18)        | 36% (16/45)  | 11% (3/27)     | 20% (2/10)    | 15% (2/13)               |
| Vascular disease                               | 0% (0/18)        | 13% (6/45)   | 0% (0/27)      | 10% (1/10)    | 0% (0/13)                |
| Hypertension                                   | 6% (1/18)        | 56% (25/45)  | 70% (19/27)    | 40% (4/10)    | 31% (4/13)               |
| Diabetes mellitus                              | 0% (0/18)        | 40% (18/45)  | 59% (16/27)    | 30% (3/10)    | 15% (2/13)               |
| Obesity                                        | 0% (0/18)        | 22% (10/45)  | 37% (10/27)    | 0% (0/10)     | 8% (1/13)                |
| Kidney disease                                 | 0% (0/18)        | 22% (10/45)  | 11% (3/27)     | 10% (1/10)    | 38% (5/13)               |
| Autoimmune disease                             | 6% (1/18)        | 7% (3/45)    | 0% (0/27)      | 10% (1/10)    | 46% (6/13)               |
| Hematologic malignancy                         | 0% (0/18)        | 0% (0/45)    | 0% (0/27)      | 0% (0/10)     | 23% (3/13)               |
| Non-hematology malignancy                      | 0% (0/18)        | 11% (5/45)   | 7% (2/27)      | 20% (2/10)    | 0% (0/13)                |
| Solid organ transplant                         | 0% (0/18)        | 0% (0/45)    | 0% (0/27)      | 10% (1/10)    | 46% (6/13)               |
| HSC transplant                                 | 0% (0/18)        | 0% (0/45)    | 0% (0/27)      | 0% (0/10)     | 8% (1/13)                |
| Immunosuppressed                               | 0% (0/18)        | 0% (0/45)    | 0% (0/27)      | 0% (0/10)     | 100% (13/13)             |
| <b>Treatments received</b>                     |                  |              |                |               |                          |
| Hydroxychloroquine                             | 0% (0/18)        | 9% (4/45)    | 11% (3/27)     | 10% (1/10)    | 8% (1/13)                |
| Azithromycin                                   | 0% (0/18)        | 7% (3/45)    | 15% (4/27)     | 10% (1/10)    | 23% (3/13)               |
| Remdesivir                                     | 0% (0/18)        | 7% (3/45)    | 15% (4/27)     | 10% (1/10)    | 38% (5/13)               |
| Tocilizumab <sup>†</sup>                       | 0% (0/18)        | 22% (10/45)  | 19% (5/27)     | 0% (0/10)     | 31% (4/13)               |
| Anakinra                                       | 0% (0/18)        | 0% (0/45)    | 4% (1/27)      | 0% (0/10)     | 0% (0/13)                |
| Corticosteroids                                | 0% (0/18)        | 7% (3/45)    | 7% (2/27)      | 10% (1/10)    | 15% (2/13) <sup>‡‡</sup> |

\* PCR-positive days is defined as the numbers of days from the first documents PCR-positive result to the last document PCR-positive result that was followed by at least one PCR-negative result

<sup>†</sup> The majority of patients receiving tocilizumab were enrolled in a blinded randomized control trial with 2:1 randomization of tocilizumab to placebo, except for two patient who received it off-label

<sup>‡‡</sup> In the immunosuppressed cohort, corticosteroid treatment refers to patients that newly started corticosteroids or had an increase in their baseline dose of corticosteroids (if applicable)

**Table S1. Clinical data from COVID-19 patients, Related to Figure 1. Clinical data is shown for each pre-defined severity cohort.**
